# Supplementary figures and images for: Systemic Therapy for Atopic Dermatitis in Children and Adolescents: A US Expert Consensus
Source: PubMed Central journal article supplement — Dermatology. 2024 Oct 15;240(5-6):897–909. doi: 10.1159/000540920 (PMC11651338; doi:10.1159/000540920), 2024-10-15

# Supplementary Figure 1. Round 1 Voting Results

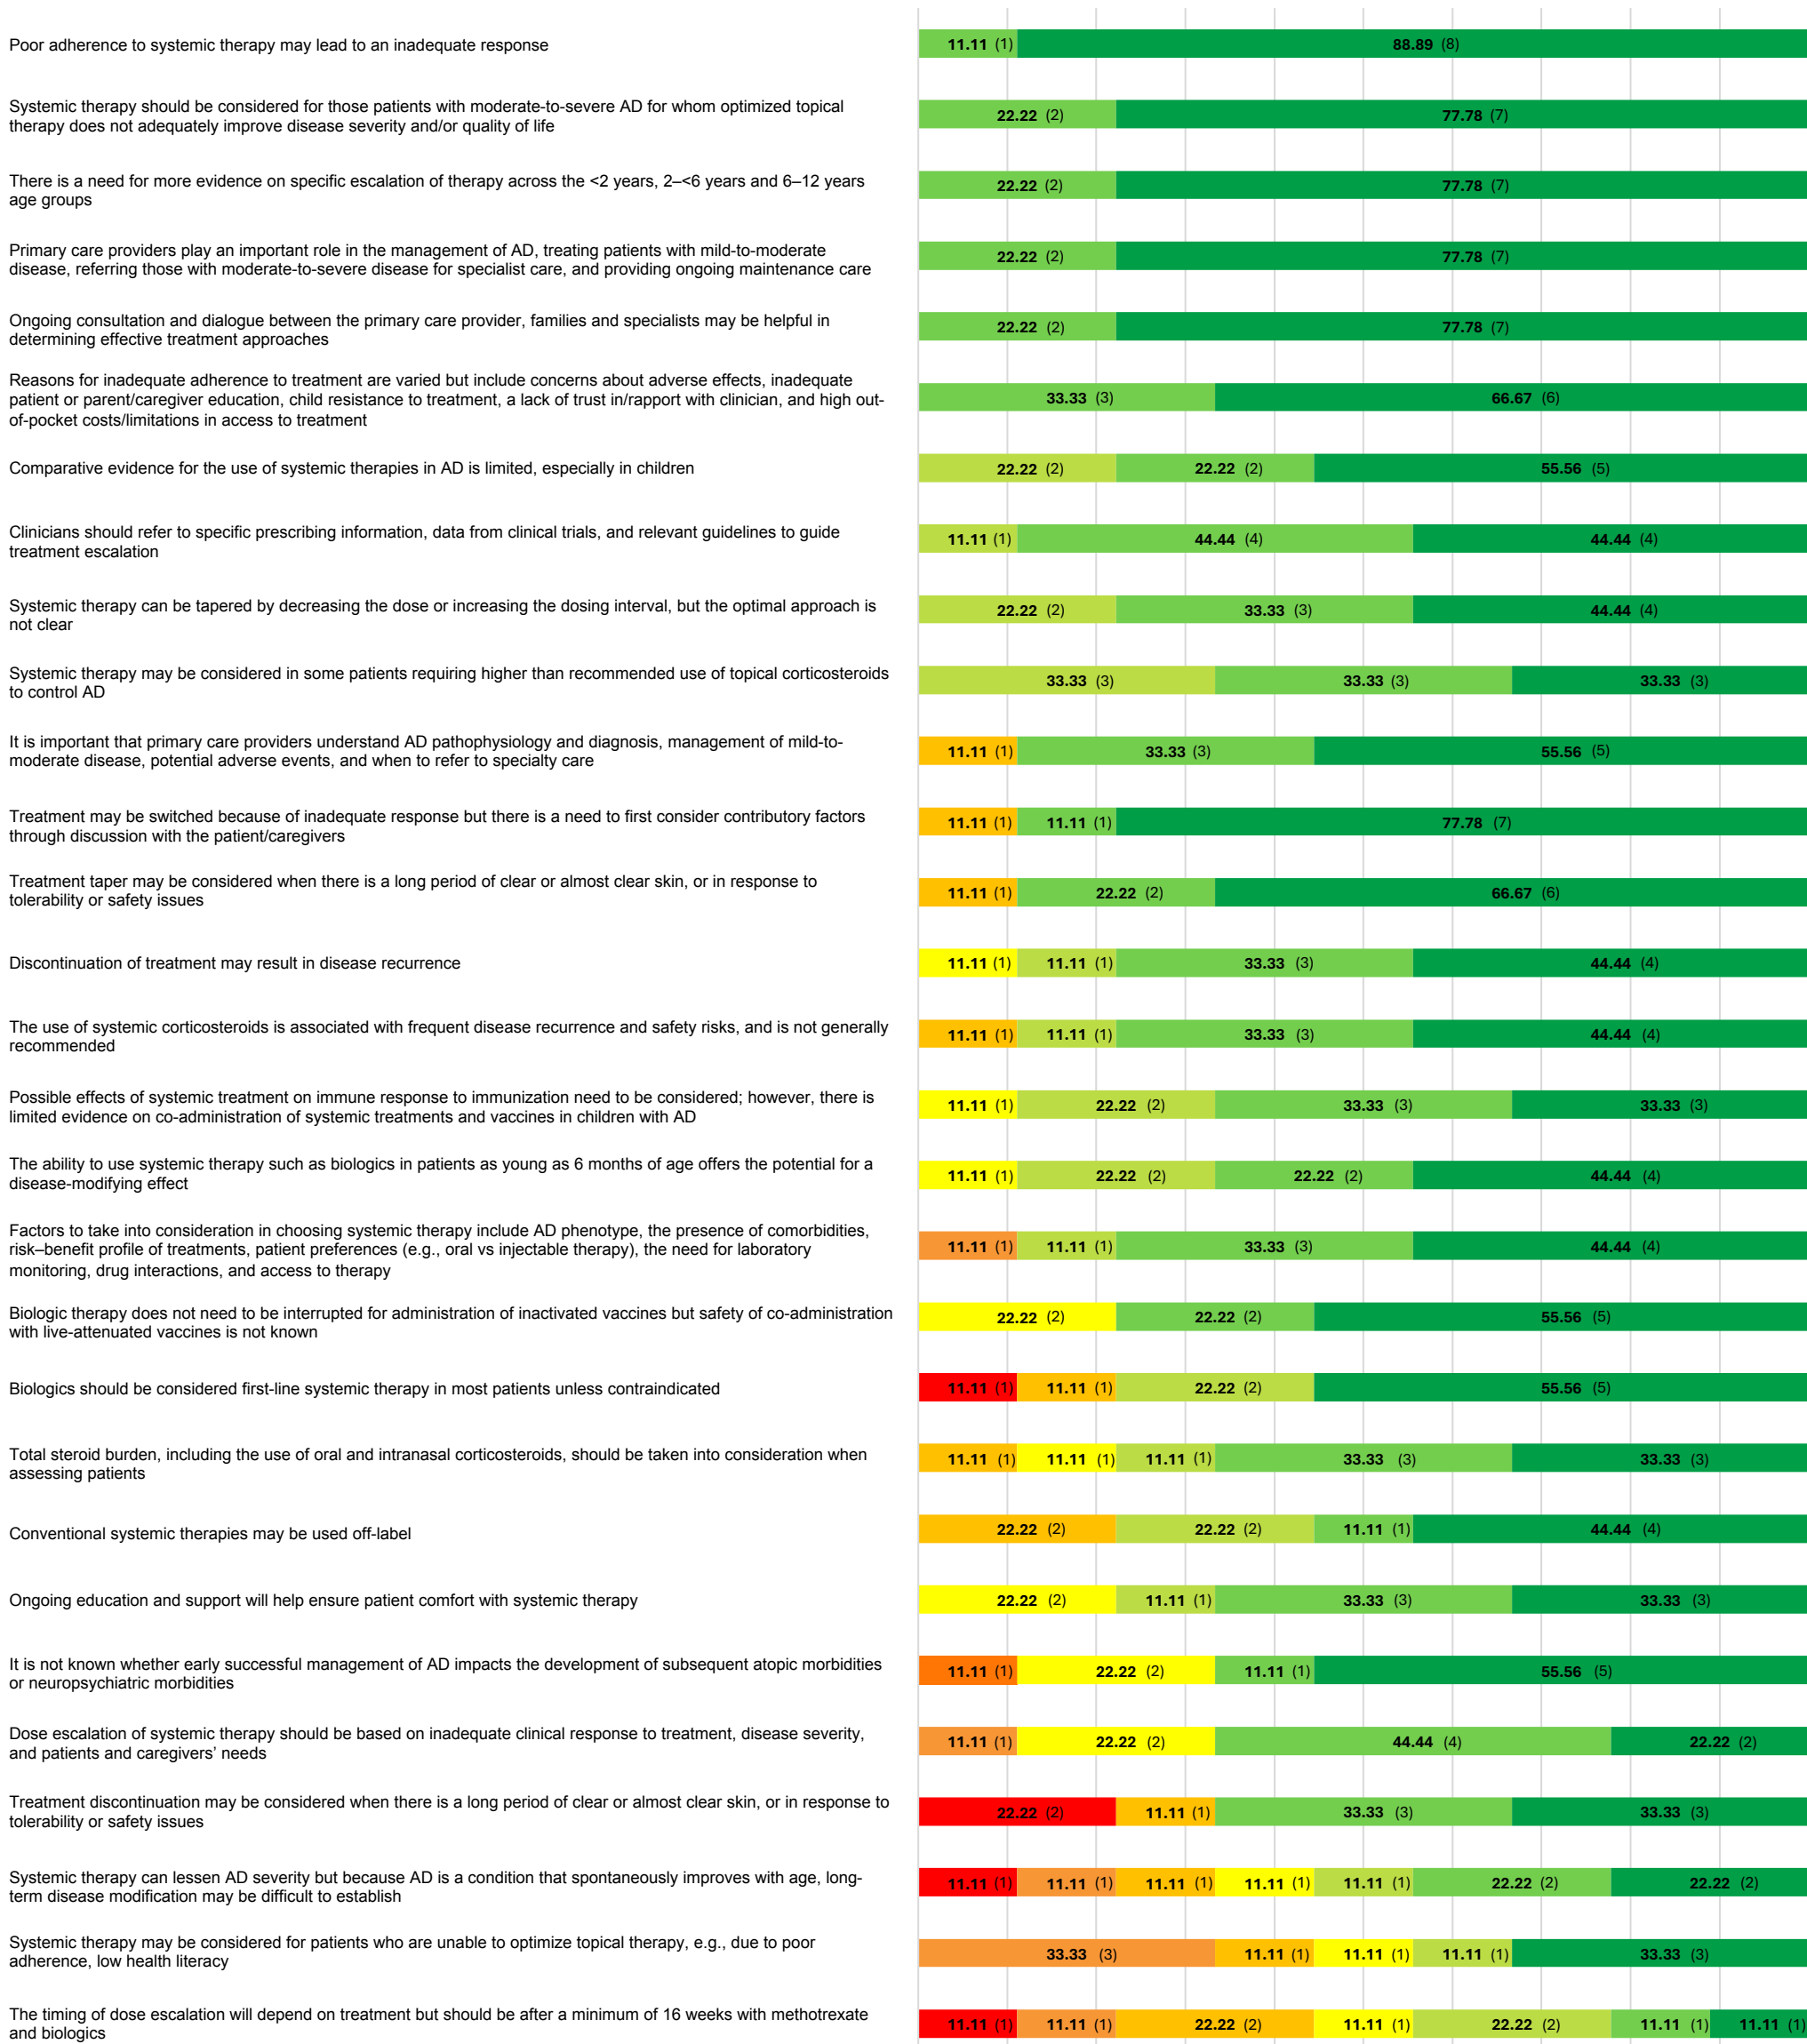

■ 1- Strongly disagree ■ 2 ■ 3 ■ 4 ■ 5 ■ 6 ■ 7 ■ 8 ■ 9- Strongly agree

Supplement: Supplementary_material-Suppl.1-s1.pdf [file Supplementary_material-Suppl.1-s1.pdf]
